# Supplementary material
Source: Research Square preprint supplement (doi:10.21203/rs.3.rs-8972105/v1)
Supplement: Supplementary file 1 [file 43378f23f2e14b3f16373a4b.docx]

STROBE Statement—checklist of items that should be included in reports of observational studies

|  | Item No | Recommendation | Description |
| --- | --- | --- | --- |
| **Title and abstract** | 1 | (*a*) Indicate the study’s design with a commonly used term in the title or the abstract | Title and Abstract. The study is described as a "Development and Validation" study. The abstract states a prospective design deployed during an emergency medicine clerkship. |
| (*b*) Provide in the abstract an informative and balanced summary of what was done and what was found | Abstract (p.3–4). Structured abstract with Background, Methods, Results, and Conclusions summarizing platform components, study design, key metrics, and principal findings. |
| Introduction | |  | |
| Background/rationale | 2 | Explain the scientific background and rationale for the investigation being reported | Introduction (p.5–6). Paragraphs 1–4 describe the rationale: resource-intensive nature of OSCE, limitations of prior AI-based solutions (text-only, retrospective), and the need for real-time voice-based simulation and formative feedback. |
| Objectives | 3 | State specific objectives, including any prespecified hypotheses | Introduction, last paragraph (p.6). "This study aims to define and empirically examine the dimensions that should be scrutinized as such systems enter routine educational use, with a particular focus on performance fidelity, usability, and deployment within authentic educational settings." |
| Methods | |  | |
| Study design | 4 | Present key elements of study design early in the paper | Methods, Study design, setting, and participants (p.9). Prospective validation study with sequential two-station CPX design (VSP encounter followed by HSP encounter). |
| Setting | 5 | Describe the setting, locations, and relevant dates, including periods of recruitment, exposure, follow-up, and data collection | Methods, Study design, setting, and participants (p.9). Emergency medicine clerkship, Yonsei University College of Medicine, Seoul, South Korea; November 2025 – January 2026. |
| Participants | 6 | (*a*) *Cohort study*—Give the eligibility criteria, and the sources and methods of selection of participants. Describe methods of follow-up  *Case-control study*—Give the eligibility criteria, and the sources and methods of case ascertainment and control selection. Give the rationale for the choice of cases and controls  *Cross-sectional study*—Give the eligibility criteria, and the sources and methods of selection of participants | Methods, Study design, setting, and participants (p.9). Year 3–4 medical students enrolled in the emergency medicine clerkship (N=60). Resource-limited STS model (n=30, first half) and full-capacity STS model (n=30, second half). |
| (*b*)*Cohort study*—For matched studies, give matching criteria and number of exposed and unexposed  *Case-control study*—For matched studies, give matching criteria and the number of controls per case | Methods, Study design, setting, and participants (p.9). Not a matched study. Sequential (non-randomized) assignment to model groups described. |
| Variables | 7 | Clearly define all outcomes, exposures, predictors, potential confounders, and effect modifiers. Give diagnostic criteria, if applicable | Methods, Study design, setting, and participants (p.9). Not a matched study. Sequential (non-randomized) assignment to model groups described. |
| Data sources/ measurement | 8* | For each variable of interest, give sources of data and details of methods of assessment (measurement). Describe comparability of assessment methods if there is more than one group | Methods, Data collection (p.9–10) and Outcome Measures (p.10–11). MIU-level manual coding by JWS; professor real-time scoring; resident video-based scoring; CPX-RTE automated scoring. Post-session surveys adapted from Cook et al. with operational criteria. Cost from OpenAI dashboard. |
| Bias | 9 | Describe any efforts to address potential sources of bias | Methods, Outcome Measures (p.10–11) and Discussion, Limitation (p.19). Independent blinded human raters; de-identified data; Benjamini–Hochberg FDR adjustment. Limitations acknowledge non-randomized assignment, single session, single institution. |
| Study size | 10 | Explain how the study size was arrived at | Methods, Study design, setting, and participants (p.9). N=60 (30 per model group). No formal sample size calculation reported; determined by clerkship enrollment. |
| Quantitative variables | 11 | Explain how quantitative variables were handled in the analyses. If applicable, describe which groupings were chosen and why | Methods, Outcome Measures (p.10–11) and Statistical analysis (p.12). Error rates as proportions per MIU; Gwet's AC1 on binary checklist items; usability as mean (95% CI); SUS as median (IQR). |
| Statistical methods | 12 | (*a*) Describe all statistical methods, including those used to control for confounding | Methods, Statistical analysis (p.12). Welch's t-tests, Gwet's AC1, participant-level cluster bootstrap resampling (1,000 iterations), Benjamini–Hochberg FDR, complete-case approach. Python ver 3.14.2. |
| (*b*) Describe any methods used to examine subgroups and interactions | Methods, Outcome Measures (p.10–11) and Results. Error subtype analyses; section-level and item-level AC1; usability compared between model groups. |
| (*c*) Explain how missing data were addressed | Methods, Statistical analysis (p.12). "Analyses were conducted using a complete-case approach." |
| (*d*) *Cohort study*—If applicable, explain how loss to follow-up was addressed  *Case-control study*—If applicable, explain how matching of cases and controls was addressed  *Cross-sectional study*—If applicable, describe analytical methods taking account of sampling strategy | Not applicable. This is not a cohort or case-control study. Sequential model assignment described in Methods (p.9); acknowledged in Limitation (p.19). |
| (*e*) Describe any sensitivity analyses | Not performed. |

Continued on next page

| Results | | | |  | |
| --- | --- | --- | --- | --- | --- |
| Participants | 13* | (a) Report numbers of individuals at each stage of study—eg numbers potentially eligible, examined for eligibility, confirmed eligible, included in the study, completing follow-up, and analysed | | | Results, Participants (p.13) and Table 1 (p.23). Sixty students completed the study; no attrition reported. | |
| (b) Give reasons for non-participation at each stage | | | Not applicable. All 60 enrolled participants completed the study. | |
| (c) Consider use of a flow diagram | | | Not provided. | |
| Descriptive data | 14* | (a) Give characteristics of study participants (eg demographic, clinical, social) and information on exposures and potential confounders | | | Results, Participants (p.13) and Table 1 (p.23). Age, sex, year in medical school by model group. | |
| (b) Indicate number of participants with missing data for each variable of interest | | | Not explicitly reported. Complete-case approach used (Methods, p.12). | |
| (c) *Cohort study*—Summarise follow-up time (eg, average and total amount) | | | Not applicable. Single-session study design. | |
| Outcome data | 15* | *Cohort study*—Report numbers of outcome events or summary measures over time | | | Not a cohort study. See Results (p.13–15) for outcome data: 3,282 MIUs analyzed; AC1 values; usability scores. | |
| *Case-control study—*Report numbers in each exposure category, or summary measures of exposure | | | Not applicable. | |
| *Cross-sectional study—*Report numbers of outcome events or summary measures | | | Results (p.13–15), Table 2 (p.23), Table 3 (p.23), Figures 2–3 (p.27–28). MIU error rates, Gwet's AC1, usability scores, SUS, and cost reported. | |
| Main results | 16 | (*a*) Give unadjusted estimates and, if applicable, confounder-adjusted estimates and their precision (eg, 95% confidence interval). Make clear which confounders were adjusted for and why they were included | | | Results (p.13–15). All estimates reported with 95% CIs: CPX-VSP error rates (Figure 2), CPX-RTE AC1 (Table 2), CPX-RTE usability (Table 3), SUS median (IQR). Unadjusted estimates; no confounder adjustment. | |
| (*b*) Report category boundaries when continuous variables were categorized | | | Methods, Outcome Measures (p.10–11). Binary Yes/No for checklist items; 1–6 Likert scales with operational criteria (Supplementary Method 1); 1–5 SUS scale. | |
| (*c*) If relevant, consider translating estimates of relative risk into absolute risk for a meaningful time period | | | Not applicable. | |
| Other analyses | 17 | Report other analyses done—eg analyses of subgroups and interactions, and sensitivity analyses | | | Results (p.13–15) and Supplementary Tables S1–S5. Section-level and item-level AC1 analyses; error subtype analyses; qualitative thematic analysis; cost analysis; bias assessment. | |
| Discussion | |  | | | |
| Key results | 18 | Summarise key results with reference to study objectives | | | Discussion, paragraph 1 (p.16). Key findings summarized: CPX-VSP supported coherent voice dialogue; CPX-RTE showed high agreement with expert raters; overall good usability. | |
| Limitations | 19 | Discuss limitations of the study, taking into account sources of potential bias or imprecision. Discuss both direction and magnitude of any potential bias | | | Discussion, Limitation (p.19). Four limitations: (1) single institution/chief complaint; (2) single-session novelty effects; (3) no clinical performance outcomes; (4) non-randomized sequential model assignment. | |
| Interpretation | 20 | Give a cautious overall interpretation of results considering objectives, limitations, multiplicity of analyses, results from similar studies, and other relevant evidence | | | Discussion (p.16–19). Cautious interpretation: emphasizes "prospective feasibility"; discusses boundaries of automated evaluation (Patient–Physician Interaction domain); advocates human-in-the-loop framework; addresses cost–capability equity concerns. | |
| Generalisability | 21 | Discuss the generalisability (external validity) of the study results | | | Discussion, Limitation (p.19). Single-institution, single-scenario design; need for multi-institutional and multi-scenario studies acknowledged. Ongoing development toward ubiquitous, on-demand learning described. | |
| Other information | | |  | | |
| Funding | 22 | Give the source of funding and the role of the funders for the present study and, if applicable, for the original study on which the present article is based | | | No funding was received for this study. | |

*Give information separately for cases and controls in case-control studies and, if applicable, for exposed and unexposed groups in cohort and cross-sectional studies.

**Note:** An Explanation and Elaboration article discusses each checklist item and gives methodological background and published examples of transparent reporting. The STROBE checklist is best used in conjunction with this article (freely available on the Web sites of PLoS Medicine at http://www.plosmedicine.org/, Annals of Internal Medicine at http://www.annals.org/, and Epidemiology at http://www.epidem.com/). Information on the STROBE Initiative is available at www.strobe-statement.org.
