# Supplementary material
Source: Research Square preprint supplement (doi:10.21203/rs.3.rs-8972105/v1)
Supplement: Supplementary file 2 [file 51da3460cfa71bb0aac3efd2.docx]

**Supplementary Materials**

[Supplementary Method 1. Post-session usability survey instruments 1](#_Toc222763463)

[Supplementary Table S1. Comparison of subjective evaluation scores for CPX-VSP models (resource-limited vs full-capacity) 7](#_Toc222763464)

[Supplementary Table S2. Themes Contributing to Perceived Authenticity and Immersion in CPX-VSP 8](#_Toc222763465)

[Supplementary Table S3. Themes Contributing to Loss of Immersion and Interactional Limitations 9](#_Toc222763466)

[Supplementary Table S4. CPX-RTE item-based evaluation (Gwet’s AC1) 12](#_Toc222763467)

[Supplementary Table S5. Themes Related to Scoring Accuracy Concerns and Perceived Educational Utility of CPX-RTE 14](#_Toc222763468)

# **Supplementary Method 1. Post-session usability survey instruments**

| **Title: CPX-MATE Usability Evaluation Survey**  **🩺 AI-Based Integrated CPX Training and Evaluation Platform (CPX-MATE)**  Hello, This is the CPX-MATE team from Yonsei University College of Medicine.  This survey aims to evaluate the usefulness of, and areas for improvement in, **CPX-MATE (CPX with Medical students’ Assistant for Training and Evaluation)**, an AI-based integrated platform for CPX training and evaluation currently under development at Yonsei University College of Medicine.  CPX-MATE consists of the following modules:   - **CPX-VSP (Training):** A module that allows students to practice CPX by engaging in realistic dialogue with an AI-based virtual standardized patient (SP). - **CPX-RTE (Evaluation):** A module that automatically scores CPX encounters—including both virtual SP interactions and recordings of real CPX sessions—and provides structured, detailed feedback.   Your responses will be valuable for improving CPX education and for the development of AI-based educational tools.  **Participation Information**   - This survey takes approximately **10–15 minutes** to complete. - All responses are **anonymous**, and you may discontinue participation at any time. - Responses will be used **solely for educational improvement and research purposes**. - By participating in this survey, you are considered to have understood and agreed to the above information. (You must select “I agree” to proceed to the survey.)   **October 28, 2025** Chaeryoung Park, MD, MS Assistant Professor of Emergency Medicine Yonsei University College of Medicine  **Section 1. Consent**  **Do you agree to participate in this survey?**   - I agree - I do not agree   **Section 2. CPX-VSP (Training Module) Experience**  CPX-VSP is a module that allows you to practice CPX through realistic dialogue with an AI-based virtual standardized patient (SP).  This section consists of:   - 🩺 **Five items assessing dialogue authenticity**, and - 💬 **Five items assessing your experience as a student physician**.   **Response Scale (1–6 Likert)**  Please read the operational criteria carefully before responding.  1 – **Strongly disagree** Very low realism and completeness. Serious flaws that make the experience ineffective or potentially harmful for learning.  2 – **Disagree** Lacks realism and contains major flaws, limiting its educational value.  3 – **Slightly disagree** Somewhat resembles real dialogue, but noticeable artificial elements interfere with immersion.  4 – **Slightly agree** Fairly natural and similar to real dialogue. Some artificial aspects exist but do not substantially hinder learning.  5 – **Agree** Highly realistic and close to real dialogue. Minor artificial elements are easily overlooked.  6 – **Strongly agree** Extremely natural and well-developed, comparable to interacting with a real patient.  **Have you carefully read and understood the rating criteria above?**   - Yes - No (Please read them carefully to ensure consistent evaluation.)   **🩺 Dialogue Authenticity**   1. The virtual patient’s responses felt natural and human-like. *(Humanlike)* 2. The virtual patient’s responses were consistent and contextually appropriate throughout the dialogue. *(Coherent)* 3. The virtual patient’s responses were clinically meaningful and helpful. *(Clinically Relevant)* 4. The overall dialogue felt similar to a real patient–physician conversation. *(Overall)*   (Response scale: 1 = Strongly disagree to 6 = Strongly agree)  **💬 User Experience**   1. Excluding the inability to perform physical examinations, the virtual SP encounter felt similar to a real clinical encounter. *(Realness)* 2. I had to continuously reorganize my clinical reasoning based on newly revealed information, as with a real patient. *(Cognitive Authenticity)* 3. The dialogue progressed naturally, spontaneously, and with appropriate complexity. *(Variability)* 4. I felt immersed and able to concentrate during the interaction. *(Involvement)* 5. I felt as though I was actively seeing a patient as a physician. *(Overall)*   (Response scale: 1 = Strongly disagree to 6 = Strongly agree)  **[Optional] What factors helped the virtual patient feel realistic?**  **[Optional] What factors interfered with perceiving the virtual patient as realistic?**  **Section 3. CPX-RTE (Evaluation Module) Experience**  CPX-RTE is an AI module that automatically scores CPX encounters—either recorded real CPX sessions or virtual SP interactions—and provides itemized feedback.  The following items assess the specificity and educational value of the feedback provided by CPX-RTE.  **Response Scale (1–6 Likert)**  Please read the operational criteria carefully before responding.  1 – **Strongly disagree** The feedback is entirely inappropriate, containing clear errors or distortions, and is not helpful for learning.  2 – **Disagree** The feedback is poorly developed, omits important content, or is misdirected, offering little educational value.  3 – **Slightly disagree** The feedback is formally structured but lacks specificity or accuracy and requires improvement; comparable to feedback from a novice instructor.  4 – **Slightly agree** The feedback is generally acceptable and addresses basic learning points, though somewhat superficial.  5 – **Agree** The feedback is specific and valid, comparable to that provided by an experienced clinical educator.  6 – **Strongly agree** The feedback is insightful and precise, capturing key issues at a level perceived as equal to or exceeding that of trained experts.  **Have you carefully read and understood the rating criteria above?**   - Yes - No (Please read them carefully to ensure consistent evaluation.)   **Did you read the narrative (free-text) feedback?**   - Yes - No   **Did you review the checklist-based scoring table (History Taking / Physical Examination / Patient Education / Patient–Physician Interaction)?**   - Yes - No  1. The feedback accurately identified the student physician’s key strengths and weaknesses. *(Evidence-Based)* 2. The feedback included specific and actionable suggestions for improvement. *(Actionable)* 3. The feedback logically connected the student’s observed behaviors with the suggested improvements. *(Connected)* 4. The feedback maintained an appropriate balance between positive and critical comments. *(Balanced)*   (Response scale: 1 = Strongly disagree to 6 = Strongly agree)  **[Optional] Please describe any aspects of CPX-RTE that were inconvenient or in need of improvement.** (e.g., presentation of scores, specificity of feedback, time required)  **[Optional] Please suggest any additional features or feedback formats you would like to see in CPX-RTE.** (e.g., concise narrative summaries focusing on key deficiencies)  **Section 4. Bias Assessment**  The following item is included to support the development of safe and responsible AI applications.  **Did you perceive any biased or stereotyped expressions related to sex, age, race/ethnicity, or socioeconomic status in the virtual patient dialogue or AI-generated feedback?**   - No, I did not perceive any bias. - Yes, I perceived biased or stereotyped content.   **Section 5. Bias Details (If Applicable)**  If you answered “Yes,” please describe in detail:   1. In which module did the bias occur? (Virtual patient module or evaluation/feedback module) 2. What specific expression or content did you find biased or inappropriate? (Please describe as specifically as possible.)   To improve the system, researchers may manually review the corresponding audio recordings and transcripts if necessary.  **Section 6. Overall System Evaluation (System Usability Scale, SUS)**  CPX-MATE is a web-based learning platform integrating a virtual patient training module and an automated evaluation module.  The following items assess overall usability, consistency, and integration of the web application.  *(1 = Strongly disagree, 5 = Strongly agree)*   1. I would like to use this system frequently. 2. I found the system unnecessarily complex. 3. I thought the system was easy to use. 4. I think I would need technical support to use this system. 5. I found the various functions in this system well integrated. 6. I thought there was too much inconsistency in this system. 7. I imagine that most people would learn to use this system very quickly. 8. I found the system very cumbersome to use. 9. I felt confident using the system. 10. I needed to learn a lot of things before I could get going with this system.   **Section 7. Participant Information**  The following information will be used **only for subgroup analyses** of CPX-MATE satisfaction.   - Student ID number (e.g., 2019191001) - Date of birth (YYMMDD; e.g., 990225) - Sex: Male / Female - Current year in medical school:   - Year 3   - Year 4 |
| --- |

# **Supplementary Table S1. Comparison of subjective evaluation scores for CPX-VSP models (resource-limited vs full-capacity)**

| **Item** | **Resource-limited Model,**  **mean score (95% CI)** | **Full-capacity model,**  **mean score (95% CI)** | **Δ (Full-capacity - Resource-limited),**  **mean score (95% CI)** | **P-value** |
| --- | --- | --- | --- | --- |
| **Humanlike** | 3.60 (3.20–3.97) | 3.93 (3.60–4.27) | 0.33 (-0.17–0.87) | 0.265 |
| **Coherent** | 4.03 (3.67–4.43) | 4.77 (4.43–5.13) | 0.73 (0.23–1.27) | 0.0341 |
| **Clinically Relevant** | 4.63 (4.20–5.03) | 4.90 (4.63–5.20) | 0.27 (-0.20–0.77) | 0.334 |
| **Dialogue Overall** | 3.77 (3.33–4.20) | 4.17 (3.83–4.53) | 0.40 (-0.17–0.97) | 0.235 |
| **Realness** | 3.57 (3.10–4.00) | 4.07 (3.73–4.40) | 0.50 (-0.00–1.03) | 0.194 |
| **Cognitive Authenticity** | 4.60 (4.23–4.97) | 4.73 (4.40–5.03) | 0.13 (-0.37–0.63) | 0.605 |
| **Variability** | 4.07 (3.67–4.47) | 4.47 (4.13–4.80) | 0.40 (-0.10–0.93) | 0.235 |
| **Involvement** | 3.40 (2.87–3.90) | 4.37 (4.03–4.70) | 0.97 (0.37–1.63) | 0.0188 |
| **UX Overall** | 3.27 (2.83–3.63) | 4.27 (3.90–4.60) | 1.00 (0.47–1.63) | 0.0100 |

Values are presented as mean (95% confidence interval). Delta represents the mean difference between models (full-capacity minus resource-limited). P values were calculated using two-sided Welch’s t-tests, with multiple comparisons adjusted using the Benjamini–Hochberg false discovery rate procedure. Confidence intervals were estimated via bootstrap resampling (1,000 iterations).

# **Supplementary Table S2. Themes Contributing to Perceived Authenticity and Immersion in CPX-VSP**

| **Theme and Subtheme** | **Description** | **Illustrative quotes (English translation)** | **N**  **(resource-limited / full-capacity)** |
| --- | --- | --- | --- |
| **1. Content-driven immersion** |  |  |  |
| **1.1 Coherent response** | Realism was driven by the perception that the VSP understood the question’s intent and responded appropriately, plausibly, and with minimal obvious errors (including preparedness for minor questions). | **P02:** “The responses were quite appropriate… Even when I interrupted, it continued without issues.”  **P06:** “It felt prepared even for minor questions.”  **P15:** “It expressed the clinical presentation well.”  **P54:** “Even with the cushioning language typical in CPX, it grasped the point and answered.” | **8 / 10** |
| **2. Interactional/affective realism** |  |  |  |
| **2.1 Patient-like voice** | Natural, everyday speech and a patient-like tone (sometimes resembling a real SP) enhanced authenticity. | **P23:** “The speech felt natural—like talking to a real person.” **P55:** “The tone sounded like a patient / a real person.”  **P04:** “It answered the way real patients would.” | **4 / 6** |
| **2.2 Affective and reactive** | Emotional expression and “reactions” (adding small extra remarks) were perceived as human-like behavioral cues. | **P22:** “Natural reactions, and it added extra remarks.”  **P53:** “Emotional acting.” | **0 / 2** |
| **2.3 Responsive dialogue flow** | Smooth turn-taking (including after interruption), natural conversational flow, and handling unexpected turns/questions supported perceived realism. | **P02:** “Even when I interrupted, it continued without issues.”  **P42:** “The fact that it was a real dialogue made it feel realistic.”  **P49:** “It felt everyday and like a real patient; the flow followed my questions naturally.”  **P34:** “It included an unexpected question mid-conversation.” | **3 / 2** |

# **Supplementary Table S3. Themes Contributing to Loss of Immersion and Interactional Limitations**

| **Theme and Subtheme** | **Description** | **Illustrative quotes (English translation)** | **N**  **(resource-limited / full-capacity)** |
| --- | --- | --- | --- |
| **1. Content breaks clinical realism** |  |  |  |
| **1.1 Tangential responses** | Immersion was disrupted when the VSP misunderstood the intent of questions, produced answers unrelated to the asked domain, or responded with clinically incongruent content that broke the conversational logic. | **P10:** “When I said I would examine the lungs, it answered about an abdominal exam—it felt scripted and broke immersion.”  **P33:** “At times it gave answers that didn’t match my question.” | **12 / 3** |
| **1.2 Scripted system-like** | Role-play broke when the VSP abruptly used system-like phrasing or stepped out of the patient role (e.g., rigid template phrases or “not in the scenario” responses). | **P04:** “A stiff phrase like ‘It is normal’ suddenly appeared and broke immersion.”  **P04:** “When asked about past jobs, it replied, ‘That isn’t in the scenario.’” | **2 / 0** |
| **1.3 Oversharing** | Participants reported reduced realism when the VSP volunteered information before being asked, provided overly complete/organized details, or answered “too helpfully,” which felt unlike real patient communication and distorted time management. | **P50:** “It felt overly helpful; it often tells everything before I even ask, which is unlike real patients.”  **P29:** “I only asked about alcohol/smoking, but it volunteered frequency and amount on its own.” | **9 / 2** |
| **1.4 Repetition** | Realism was reduced when the VSP repeated the same answer across slightly different questions, making the exchange feel patterned or mechanical. | **P06:** “With slightly different questions, it often repeated the same answer multiple times.” | **1 / 0** |
| **2. Interactional/affective realism** |  |  |  |
| **2.1 Monotone / not in pain** | Participants noted immersion loss when voice qualities (tone, prosody, intonation) felt “AI-like,” monotone, or incongruent with a patient in pain (e.g., overly bright/energetic voice). | **P09:** “The TTS sounded lively rather than like a sick patient, so immersion was difficult.”  **P56:** “It had the typical AI-like speaking style and intonation.” | **8 / 4** |
| **2.2 Limited empathy cues** | Participants described difficulty maintaining a patient–physician relationship when empathy/rapport cues were sparse or when suffering/pain was not conveyed (verbally or nonverbally), making the interaction feel less human. | **P18:** “Because it felt like talking to a machine, I also ended up questioning mechanically rather than building rapport.”  **P47:** “Without nonverbal cues about pain/state, it was hard to insert empathy appropriately.” | **3 / 3** |
| **3. System & modality constraints** |  |  |  |
| **3.1 Latency** | Delays between question and answer (time lag) disrupted the rhythm of CPX-style interaction and reduced realism. | **P07:** “There was a delay in answering, which made it feel less real.”  **P53:** “With long questions/explanations, the time lag became very noticeable.” | **4 / 6** |
| **3.2 Dialogue breakdown** | Immersion broke when responses intermittently stopped, conversations were cut off, or the system failed mid-dialogue. | **P32:** “After I explained the abdominal CT, it suddenly stopped responding and the dialogue broke.” | **0 / 4** |
| **3.3 Physical exam unavailability** | Participants reported reduced realism due to constraints intrinsic to the modality: physical exams being performed “by description,” inability to observe the patient’s appearance, and lack of embodied clinical cues. | **P05:** “Not seeing the patient, and having to do the physical exam verbally, broke immersion.”  **P21:** “Not being able to perform the physical exam.” | **5 / 5** |
| **3.4 Screen-mediated awkwardness** | The screen-mediated setting itself (not facing a person) was experienced as awkward and less authentic, independent of content quality. | **P39:** “It felt awkward because I wasn’t speaking face-to-face.”  **P42:** “I ended up staring at the screen while talking, which felt less like a real encounter.” | **0 / 2** |

# **Supplementary Table S4. CPX-RTE item-based evaluation (Gwet’s AC1)**

| **Section** | **Checklist item** | **CPX-RTE vs Professor** | **CPX-RTE vs Resident** | **Professor vs Resident** |
| --- | --- | --- | --- | --- |
| **History Taking** | Epigastric pain: chest pain vs dyspepsia | 0.841 | 0.843 | 0.878 |
| Pain location | 0.983 | 0.983 | 1.000 |
| Temporal characteristics of pain | 1.000 | 1.000 | 1.000 |
| Pain quality | 1.000 | 1.000 | 1.000 |
| Radiation of pain | 0.941 | 0.941 | 1.000 |
| Pain severity and impact on daily activities | 0.919 | 0.919 | 1.000 |
| Aggravating factors | 0.942 | 0.942 | 1.000 |
| Systemic symptoms | 1.000 | 1.000 | 1.000 |
| Anorexia, nausea, vomiting | 0.979 | 0.979 | 1.000 |
| Constipation, diarrhea, hematochezia, steatorrhea | 0.980 | 1.000 | 0.980 |
| Jaundice, abdominal distension | 0.813 | 0.843 | 0.970 |
| Dietary habits | 0.899 | 0.899 | 1.000 |
| Exercise habits | 1.000 | 0.977 | 0.977 |
| Past medical history | 0.924 | 0.903 | 0.982 |
| Current medications | 0.981 | 1.000 | 0.981 |
| Alcohol use history | 1.000 | 1.000 | 1.000 |
| Smoking history | 1.000 | 0.980 | 0.980 |
| Caffeine intake | 1.000 | 1.000 | 1.000 |
| Family history | 0.978 | 0.978 | 0.955 |
| Trauma/surgery/hospitalization history | 0.978 | 1.000 | 0.978 |
| **Physical Examination** | Ocular exam | 0.966 | 0.966 | 1.000 |
| Assessment of dehydration | 0.848 | 0.848 | 1.000 |
| Abdominal exam positioning | 0.947 | 0.983 | 0.964 |
| Abdominal exam sequence | 0.983 | 0.983 | 1.000 |
| Rebound tenderness | 0.897 | 0.94 | 0.957 |
| Liver/spleen palpation | 0.925 | 0.872 | 0.948 |
| CVA tenderness | 0.955 | 0.955 | 1.000 |
| Appendicitis provocative tests | 0.770 | 0.770 | 1.000 |
| **Education** | Explain possible causes/diagnoses | 1.000 | 1.000 | 1.000 |
| Explain need for diagnostic tests | 0.963 | 0.982 | 0.981 |
| Fasting (NPO) instructions | 0.867 | 0.867 | 0.934 |
| Explain treatment plan | 0.963 | 0.963 | 1.000 |
| Lifestyle counseling | 0.891 | 0.891 | 1.000 |
| Explain need for follow-up/admission | 0.774 | 0.839 | 0.874 |
| **Patient-Physician Interaction** | Self-introduction | 0.848 | 0.848 | 1.000 |
| Patient identification | 0.890 | 0.890 | 1.000 |
| Courtesy/rapport-building conversation | 0.760 | 0.562 | 0.804 |
| Empathy | 1.000 | 1.000 | 1.000 |
| Interim summary | 0.977 | 0.954 | 0.977 |
| Explain physical exam and obtain consent | 0.983 | 0.983 | 0.966 |
| Patient comfort after physical exam | 0.946 | 0.946 | 0.963 |
| **Explore patient’s deep concern** | 0.250 | 0.250 | 0.937 |
| Plain-language explanation | 0.983 | 1.000 | 0.983 |
| Check patient understanding | 0.640 | 0.640 | 1.000 |
| Offer opportunity for questions | 0.950 | 0.974 | 0.974 |

# **Supplementary Table S5. Themes Related to Scoring Accuracy Concerns and Perceived Educational Utility of CPX-RTE**

| **Theme and Subtheme** | **Description** | **Illustrative quotes (English translation)** | **n (all)** |
| --- | --- | --- | --- |
| **1. Structured feedback - checklist content** | | | |
| **1.1 Strict or non-contextual** | Learners felt the checklist sometimes applied rigid criteria that did not reflect clinical context (e.g., time constraints, symptom patterns), leading to perceived unfair deductions or “forced” differentials. | **P04:** “I skipped radiation pain due to time… but the scoring seems to apply strict criteria without considering context.”  **P04:** “The system makes us cover even unlikely differentials, which feels unrealistic.” | 6 |
| **1.2 Need for prioritization** | Participants suggested adding item weights or priority levels (e.g., points per item) and surfacing “most important missing items” first. | **P02:** “If you could show weights or points per checklist item, that would help.”  **P11:** “It would help if missing items were displayed first as a priority.” | 4 |
| **1.3 Granular empathy items** | Some requested more granular evaluation of relational/communication elements, such as empathy and rapport, beyond biomedical checklist items. | **P07:** “Evaluation of rapport/empathy could be more detailed.” | 2 |
| **2. Structured feedback - scoring** |  |  |  |
| **2.1** **Scoring errors in CPX-RTE** | A common concern was misclassification of performed actions (e.g., “I did it” marked as “not done”), undermining trust in the scoring. | **P18:** “I verified the patient, but it was recorded as not done.”  **P31:** “Toward the end, my voice wasn’t recognized and my score dropped.” | 2 |
| **3. Feedback/evaluation UI/UX** |  |  |  |
| **3.1 Readability and priority** | Learners found narrative feedback lengthy or mixed with praise, making key improvement points hard to spot; they wanted concise summaries and prioritized issues. | **P09:** “Praise is nice, but improvements don’t stand out.”  **P26:** “Please summarize only what needs correction and highlight priorities.” | 13 |
| **3.2 Detailed guidance** | Many requested more concrete, actionable guidance—example questions/phrases for missing items, “what to ask next,” and brief rationales tied to differential diagnosis. | **P10:** “For items marked incorrect, include what question I should have asked.”  **P20:** “Include example phrases, not just ‘ask about X.’”  **P23:** “Adding rationales (why each question/exam matters) would help learning.” | 15 |
| **3.3 Feedback format** | Users requested more structured or customizable presentation (e.g., table-based scoring, clearer structured feedback, removing emojis). | **P02:** “Remove emojis.”  **P28:** “If the scoring were presented more intuitively in a table, it would be better.” | 6 |
| **3.4 Time management support** | Some suggested time-support features (optional timer, end-of-session alerts, section-wise time tracking) to better train CPX pacing. | **P12:** “Show time spent on history/physical/education to help improve pacing.”  **P19:** “Instead of a visible timer, an alert at 2 minutes remaining could work.” | 4 |
| **3.5 Tracking across sessions** | Learners wanted longitudinal summaries of recurring gaps across repeated sessions and benchmarking (e.g., peer averages). | **P26:** “Across repeated cases, summarize what I repeatedly miss.”  **P35:** “It would be helpful to compare with others’ average scores.” | 3 |
