# Supplementary material
Source: Research Square preprint supplement (doi:10.21203/rs.3.rs-8972105/v1)
Supplement: Supplementary file 3 [file 74f47dc6462ae3928d51df96.docx]

**Table 1. Minimum items for the transparent reporting of clinical studies that present the performance of LLMs**

| **Checklist item category** | **Details** | **Yes/No/NA** |
| --- | --- | --- |
| Model identification | • Model name, version (ideally, including minor version details), and developer • Whether the model is proprietary or open-source • For proprietary LLMs: date of access and query execution • For self-managed open-source models: modifications to the base model, the source of model weights, and the commit hash or release tag when available • If feasible, sharing of the specific model used, along with a public repository URL • When known, cutoff date of training data | CPX-MATE employs four proprietary OpenAI models accessed via API. For CPX-VSP, two speech-to-speech (STS) models were used: gpt-realtime-2025-08-28 (full-capacity configuration) and gpt-realtime-mini-2025-10-06 (resource-limited configuration). For CPX-RTE, audio transcription was performed using the whisper-1 speech-to-text (STT) model, and checklist-based scoring and narrative feedback generation were carried out using gpt-5-2025-08-07. All models were accessed during the study period of November 2025 to January 2026. |
| Access mode | • Access method: web-based chatbot, API, or self-managed local deployment • Rationale for chosen access mode • Disclosure of any system-level features beyond the LLM itself (e.g., system prompts, intersession memory) when known • For self-managed local deployment, key computational environment details such as (GPU type and memory) | All models were accessed via the OpenAI API, integrated into the CPX-MATE web-based platform. No retrieval-augmented generation, external knowledge bases, function calling, or inter-session memory features were used. |
| Input data type | • Sufficient details on the type and format of data used with, or as part of, input prompts for LLM evaluation, to enable replication | For CPX-VSP, inputs consist of student voice utterances processed alongside the persona and scenario prompts by the STS model, which generates real-time spoken responses as a virtual standardized patient. For CPX-RTE, the full encounter audio recording is first transcribed by the STT model (whisper-1), and the resulting transcript is then submitted to the LLM (GPT-5) together with section-specific checklist items and few-shot example schemas for structured scoring, followed by a separate call for narrative feedback generation. |
| Adaptation strategy used | • Specification of the adaptation method(s) used, including a clear statement on whether model weights were altered (e.g., fine-tuning) or not (e.g., prompt optimization, RAG) • Use of precise terminology for non-parametric adaptation, e.g., “adaptation data” or “prompt development data” rather than ambiguous terms like “fine-tuning” or “training” data • Provision of a detailed methodological description of the adaptation process (extended details can be included in supplementary materials, if space is limited) | No model weights were modified; adaptation was achieved exclusively through prompt engineering. |
| Prompt optimization procedures | • Steps taken to create the prompts • Rationale behind selecting specific wording over alternatives (e.g., standard terminology, guideline alignment) • Specification of any deliberate prompting strategies used (e.g., chain-of-thought, reflection, instruction, few-shot) • Full, directly executable (i.e., copy-paste ready) text of representative prompts and, if feasible, a complete record of the prompts used as supplementary materials • Summary of the prompt optimization process, such as the number of iterations and interim versions of prompts (as supplementary materials, if space is limited) | Two prompt layers were developed for CPX-VSP: (1) a global SP persona prompt specifying role, tone, constraints, and interaction rules (e.g., disclose information only when asked; answer unspecified questions plausibly without contradicting the scenario; respond with corresponding physical findings when the student announces an examination), and (2) a scenario-specific prompt containing the full clinical case specification. The persona prompt was designed as a reusable, chief-complaint-agnostic control layer, while the scenario prompt served as a case-specific content layer. Prompts were iteratively refined by an emergency medicine faculty member (CP) and a medical student investigator (JWS). For CPX-RTE, a few-shot prompting strategy was used: each checklist item was accompanied by example scoring schemas that guided the LLM in mapping transcript evidence to binary Yes/No decisions. |
| Prompt execution setup | • Specific query submission configuration, such as: • If feasible, the entire experiment script used for prompt execution as supplementary materials | CPX-VSP operates as a continuous real-time STS dialogue session (12 minutes per encounter), maintaining full conversational context throughout the interaction. For CPX-RTE, the full encounter transcript is submitted to the LLM via section-level API calls — one call per checklist section (History Taking, Physical Examination, Patient Education, Patient-Physician Interaction) — each containing the transcript and the corresponding section's checklist items with few-shot example schemas. A subsequent API call generates narrative feedback based on the transcript and the structured scoring outputs. All models were accessed via the OpenAI API using default parameter settings. |
| Stochasticity management | • Settings of technical parameters, such as the temperature, that modify the level of randomness • Number of querying attempts made • Method for synthesizing multiple responses (e.g., majority vote, average score, at least one correct answer across attempts), and the rationale behind it • Analysis of the reliability of the LLM outputs across multiple attempts | All models were run using default parameter settings provided by the OpenAI API including default temperature values. Each input was processed in a single query attempt without repeated. |
| Independence of test data | • Clear disclosure of any overlap between test data and either training or adaptation data • Specification of the nature and source of data used for model adaptation and test • For test data sourced online: exact URLs, accessibility, and potential prior exposure within the model’s training corpus | CPX-RTE validation data consisted of audio-recorded human standardized patient encounters conducted prospectively during the study period (November 2025 to January 2026). These encounters were generated after the models' development and are independent of any model training data. All recordings and transcripts were de-identified before analysis. |

API = application programming interface, CPX = Clinical Performance Examination, CPX-MATE = CPX with Medical students' Assistant for Training and Evaluation, CPX-RTE = CPX with Real-Time Evaluator, CPX-VSP = CPX with Virtual Standardized Patient, GPU = graphics processing unit, HSP = human standardized patient, LLM = large language model, NA = not applicable, RAG = retrieval-augmented generation, SP = standardized patient, STS = speech-to-speech, STT = speech-to-text, URL = uniform resource locator, VSP = virtual standardized patient
